# Supplementary material for: Generation of controllable gaseous H2S concentrations using microfluidics
Source: Royal Society of Chemistry journal article supplement (doi:10.1039/c7ra12220a), 2018-01-01
Supplement: c7ra12220a1.pdf [file c7ra12220a1.pdf]

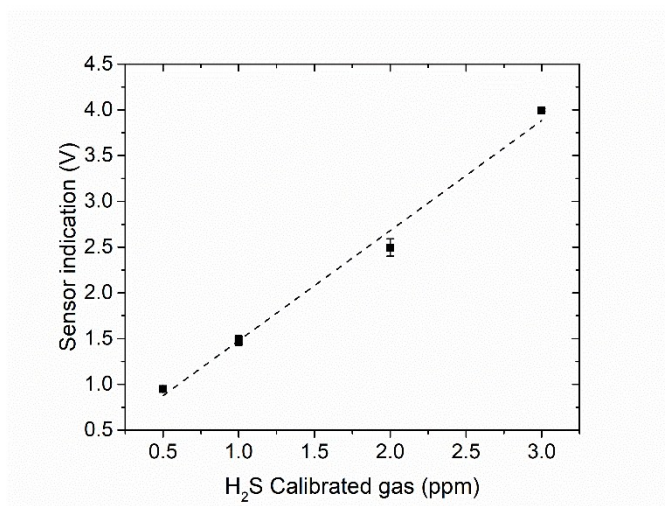

**Fig. S1.** Calibration of the electrochemical sensors by using precalibrated H<sub>2</sub>S gas mixtures.
